# Supplementary material for: A Sensitive and Robust High-Throughput Screening Assay for Inhibitors of the Chikungunya Virus nsP1 Capping Enzyme
Source: PLoS One. 2016 Jul 18;11(7):e0158923. doi: 10.1371/journal.pone.0158923 (PMC4948833; doi:10.1371/journal.pone.0158923)
Supplement: S1 Supporting Information — (XLSX) [file pone.0158923.s001.xlsx]

## Sheet: Sheet1
Fluorescence (700 channel)			Control	min bkgd	scaled		100 uM SAM	min bkgd	Scaled	% of control	100 uM GTP	min bkgd	Scaled	% of control	100 uM SAM + 100 uM GTP	min bkgd	Scaled	% of control
Background	958		7150	6192	6342.43		7780	6822	6690.9	1.00182	3840	2882	2542.85	0.380736	3870	2912	3148.37	0.4714
			7770	6812	6777.42		7810	6852	6244.79	0.935021	3800	2842	2787.46	0.417361	3910	2952	3160.06	0.47315
			8010	7052	6916.48		8220	7262	6937.21	1.03559	3900	2942	3024.44	0.452844	3970	3012	3339.56	0.500025
					6678.78		7936.67			0.990809	3846.67			0.41698	3916.67			0.481525
					299.47		245.832			0.0511806	50.3322			0.0360555	50.3322			0.0160454
Coomassie
				3.54	1.02429			3.38963	0.980783			3.04934	0.882321			3.73657	1.08117
				3.4385	0.994923			3.14977	0.911383			3.38971	0.980809			3.69963	1.07048
				3.38963	0.980783			3.30147	0.955275			3.55288	1.02802			3.83189	1.10875
				3.45604				3.28029				3.33065				3.75603
						area	mean density	IntDen				SAM	GTP	SAM + GTP
					Control	0.045	78.772	3.54474				99.0809	41.698	48.1525
						0.045	76.411	3.4385				5.11806	3.60555	1.60454
						0.045	75.325	3.38963				2.95491	2.08166	0.926382
					100 uM SAM	0.045	75.325	3.38963
						0.045	69.995	3.14977
						0.045	73.366	3.30147
					100 uM GTP	0.045	67.763	3.04934
						0.045	75.327	3.38971
						0.045	78.953	3.55288
					SAM + GTP	0.045	83.035	3.73657
						0.045	82.214	3.69963
						0.045	85.153	3.83189
					Fluorescence					Coomassie
